# Supplementary material for: A monomeric photosensitizer for targeted cancer therapy
Source: Royal Society of Chemistry journal article supplement (doi:10.1039/c4cc07628a), 2014-01-01
Supplement: c4cc07628a1.pdf [file c4cc07628a1.pdf]

# Supplementary Material (ESI) for Chemical Communications

# This journal is © The Royal Society of Chemistry 2014

## Supporting Information for A Monomeric Photosensitizer for Targeted Cancer Therapy

Ruizheng Liang,<sup>a</sup> Lina Ma,<sup>b</sup> Lele Zhang,<sup>b</sup> Chunyang Li,<sup>a</sup> Wendi Liu,<sup>a</sup> Min Wei,<sup>\*a</sup>

Dan Yan,<sup>\*b</sup> David G. Evans,<sup>a</sup> and Xue Duan<sup>a</sup>

[<sup>a</sup>] R. Liang, C. Li, W. Liu, Prof. M. Wei, Prof. D. G. Evans, Prof. X. Duan

State Key Laboratory of Chemical Resource Engineering

Beijing University of Chemical Technology

Box 98, Beijing 100029, P. R. China

Fax: (+86)10-6442-5385

E-mail: [weimin@mail.buct.edu.cn](mailto:weimin@mail.buct.edu.cn) (M. Wei)

[<sup>b</sup>] L. Ma, L. Zhang, Dr. D. Yan

Military Institute of Chinese Materia Medica

302th Military Hospital of China

Beijing 100039, P. R. China

E-mail: [yd277@126.com](mailto:yid277@126.com) (D. Yan)

### List of Contents

**Figure S1.** UV-vis absorption spectra of ZnPc loaded on different polymers (ZnPc concentration: 10 µg/mL; loading amount: 5.88%).

**Figure S2.** (A) FT-IR spectra of PVP, ZnPc and ZnPc/PVP; (B) FT-IR spectra of FA, ZnPc/PVP and ZnPc-FA/PVP.

**Figure S3.** (A) The Tyndall effect of ZnPc(5.88%)-FA/PVP, indicating the formation of colloid. (B) UV-vis absorption spectra of ZnPc(5.88%)-FA/PVP colloidal solution in the dialysis test for 48 h (molecular weight cut off 3500).

**Figure S4.** The Zeta potential for the samples of ZnPc(5.88%)/PVP (A) and ZnPc(5.88%)-FA/PVP (B).

**Figure S5.** Decay curves of ADPA absorbance in the presence of (A) blank, (B) ZnPc, (C) ZnPc(50%)/LDH, (D) ZnPc(33.3%)/LDH, (E) ZnPc(20%)/LDH, (F) ZnPc(11.1%)/LDH, (G)

ZnPc(11.1%)/LDH and (H) the normalized decay curves for ADPA absorbance at 378 nm in the presence of pristine ZnPc, ZnPc(x%)/PVP and blank measurement as a function of irradiation time (650 nm).

**Figure S6.** UV-vis absorption spectra of (A) ZnPc, (B) ZnPc(5.88%)/PVP, (C) ZnPc(11.1%)/PVP. (D) The normalized decay curves as a function of irradiation time (650 nm).

**Figure S7.** The fluorescence intensity of HepG2 cells after incubation in 10 µg/mL of ZnPc(5.88%)-FA/PVP with various FA concentrations for 24 h.

**Figure S8.** The PDT performance of ZnPc(x%)-FA/PVP with various ZnPc concentrations.

**Figure S9.** The fluorescence intensity of cell lysate samples from HepG2 cells incubated with various concentrations of ZnPc(5.88%)-FA/PVP and ZnPc(5.88%)/PVP.

**Figure S10.** The PDT performance of ZnPc with various concentrations.

**Figure S11.** Fluorescence microscopy and merged images of HepG2 cells treated with various photosensitizers without irradiation (10 µg/mL, 24 h incubation) (A) ZnPc, (B) ZnPc(5.88%)-FA/PVP, (C) ZnPc(5.88%)/PVP, (D) blank.

## **Experimental section:**

**Materials:** ZnPc, polyvinylpyrrolidone (PVP Mw=16000) and folic acid were purchased from sigma. Dulbecco's modified Eagles medium (DMEM) containing high glucose, L-glutamine, sodium pyruvate, pen-Strep (10,000 Units/mL penicillin, 10,000 µg/mL streptomycin) and 0.25% trypsin-EDTA were purchased from Gibco (Invitrogen, Carlsbad, CA). Fetal bovine serum (FBS) was purchased from Hyclone (Thermo Scientific, Rockford, IL). Phosphate-buffered saline (PBS) was purchased from Solarbio Science & Technology Co, Ltd (Beijing, China), 3-(4,5-dimethylthiazol-2-yl)-2,5-diphenyltetrazolium bromide (MTT) and potassium iodide (PI) was purchased from sigma. Human liver carcinoma (HepG2) cells were obtained from the Institute of Basic Medical Sciences Chinese Academy of Medical Sciences and cultured in DMEM containing 10% (v/v) FBS and 1% pen-strep at 37 °C in a humidified atmosphere containing 5% CO<sub>2</sub>.

**Preparation of ZnPc(x%)/PVP and ZnPc(5.88%)-FA/PVP:** series of ZnPc(x%)/PVP composite materials were synthesized *via* a facile liquid synthesis method. In brief, ZnPc and PVP with various mass ratios (ZnPc:PVP = 1:1, 1:2, 1:4; 1:8; 1:16, respectively) were simultaneously added into a centrifuge tube, followed by shaking for 12 h. The ZnPc(5.88%)-FA/PVP was prepared by a modified method based on previous report.<sup>1</sup> Firstly, ZnPc(5.88%)/PVP solution was prepared as described above. Subsequently, the protonated FA was slowly added into the ZnPc(5.88%)/PVP colloidal solution. Since the protonated FA is water-soluble while neutral FA is hydrophobic, the solution pH was adjusted with dilute hydrochloric acid very carefully and the protonated FA returned to hydrophobic FA, which can be encapsulated into ZnPc(5.88%)/PVP micelle *via* a strong ultrasonic treatment and vigorous

stirring for 12 h. This is a key step to prepare the stable ZnPc-FA/PVP colloidal solution: the dilute hydrochloric acid was added dropwise and the pH value was precisely adjusted to be neutral (pH=7.0). Finally, the ZnPc(5.88%)-FA/PVP micelle was purified by dialysis against pure water for 24 h (molecular weight cut off 3500) to remove the unbound ZnPc and FA.

**Detection of Singlet Oxygen:** the generation of singlet oxygen for the ZnPc(x%)/LDH photosensitizers was detected chemically using disodium salt of 9,10-anthracenedipropionic acid (APDA) as a singlet oxygen sensor.<sup>2</sup> An APDA solution (150  $\mu$ L, 7.5 mM) was added into the ZnPc(x%)/PVP suspension (10  $\mu$ g/mL, 3 mL) and mixed thoroughly, followed by irradiation at 650 nm using a simulated sunlight source with optical filter (650 $\pm$ 5 nm). The decrease rate of the UV absorbance at 378 nm is proportional to the amount of singlet oxygen produced, and the absorbance value was recorded per 2 min.

**In vitro Studies on Tumor Cells:** HepG2 cells were grown and expanded in 25 cm<sup>2</sup> cell-culture flask. After reaching 80–90% confluence, the HepG2 cells were washed with PBS, afterwards detached from the flask by addition of 1.0 mL of 0.25% trypsin for 1–3 min at 37 °C. HepG2 cells (1 $\times$ 10<sup>4</sup> cells/well) were seeded into two 96-well plates, respectively. To study the optimal FA capacity, the cells were then treated with different concentrations of ZnPc(5.88%)-FA/PVP suspension (ZnPc: 10  $\mu$ g/mL; FA: 10–160  $\mu$ g/mL). After a further incubation of 24 h, the plate was washed by PBS for 3 times and the fluorescence spectra of these cell lysate samples were recorded. To investigate the optimal irradiation time, the cells were treated with 10  $\mu$ g/mL of ZnPc(5.88%)-FA/PVP suspension. After a further incubation of 24 h, the plate was irradiated with a simulated sunlight source (optical filter 650 $\pm$ 5 nm) for different time. The colorimetric 3-(4,5-dimethylthiazol-2-yl)-2,5-diphenyltetrazolium bromide

(MTT) was used to determine the cell viability. The study on incubation time was performed by the same method.

To study the PDT performance, cells were treated with different concentrations of ZnPc(x%)-FA/PVP colloid. After a further incubation of 24 h, cells were washed with PBS for 3 times. The plates were irradiated with a simulated sunlight source (optical filter:  $650\pm 5$  nm; power density:  $10\text{ mW/cm}^2$ ) for 30 min. The colorimetric MTT was used to determine the cell viability. The PDT performance of ZnPc/PVP and ZnPc were performed by the same method. For the study of the phototoxicity effect, HepG2 cells ( $1\times 10^4$  cells/well) were seeded into two 96-well plates and then treated respectively with ZnPc(5.88%)-FA/PVP (equivalent ZnPc:  $10\text{ }\mu\text{g/mL}$ ; FA:  $40\text{ }\mu\text{g/mL}$ ; PVP:  $160\text{ }\mu\text{g/mL}$ ), ZnPc ( $10\text{ }\mu\text{g/mL}$ ), FA ( $200\text{ mg/mL}$ ), PVP ( $200\text{ mg/mL}$ ) suspension/solution. After a further incubation of 24 h, cells were washed with PBS for 3 times. One plate was irradiated with a simulated sunlight source (optical filter:  $650\pm 5$  nm; power density:  $10\text{ mW/cm}^2$ ) for 30 min and another was kept in the dark outside the incubator. The colorimetric MTT was used to determine the cell viability.

In a typical cellular image experiment, the cells ( $1\times 10^4$  cells/well) were seeded into two 96-well plates respectively and incubated for 24 h. The cells were treated with  $10\text{ }\mu\text{g/mL}$  of ZnPc(5.88%)/PVP, ZnPc(5.88%)-FA/PVP, pristine ZnPc and blank, followed by an incubation at  $37\text{ }^\circ\text{C}$  for another 24 h. After washing with PBS and irradiation for 0.5 h, treated cells were stained with propidium iodide (PI) and mounted for optical microscope examinations. Cells treated with the same procedure but without irradiation were also studied as a reference sample.

**Animal Experiments:** Male Balb/c mice (Balb/c-nu, ~25 g) were purchased from Academy of Military Medical Science and used under protocols approved by 302th Military Hospital Animal Research Center.  $2 \times 10^6$  HepG2 cells suspended in 200  $\mu$ L phosphate buffered saline (PBS) were subcutaneously injected into the hind flank of each male Balb/c mouse. The mice bearing HepG2 tumors were treated when the tumor volume reached  $\sim 40 \text{ mm}^3$ .

***In vivo* Photodynamics Therapy:** Mice were randomized into four groups of 8 animals per group for the following treatments: (Group i) 200  $\mu$ L of saline injected intravenously with irradiation at  $36 \text{ J/cm}^2$ ; (Group ii) 200  $\mu$ L of ZnPc(5.88%)/PVP (equivalent 50  $\mu$ g ZnPc) injected intravenously with irradiation at  $36 \text{ J/cm}^2$ ; (Group iii) 200  $\mu$ L of ZnPc(5.88%)-FA/PVP (equivalent 50  $\mu$ g ZnPc) injected intravenously with irradiation at  $36 \text{ J/cm}^2$ ; (Group iv) 200  $\mu$ L of ZnPc injected intravenously with irradiation at  $36 \text{ J/cm}^2$ . Mice with the PDT were irradiated with a simulated sunlight source (optical filter:  $650 \pm 5 \text{ nm}$ ; power density:  $20 \text{ mW/cm}^2$ ) for 30 min (i.e., an optical fluence rate of  $36 \text{ J/cm}^2$ ). The tumor size was measured by a caliper every day and calculated as the volume = (tumor length)  $\times$  (tumor width) $^2 \times 0.5$ .<sup>3</sup> Relative tumor volume was calculated as  $V/V_0$  ( $V$ ,  $V_0$  are the tumor volume measured at time  $t$  and  $t_0$ , respectively).

**Near-IR Fluorescence Images and Histology Examination:** For *in vivo* near-IR fluorescence imaging, the mice were received intravenous injection of ZnPc(5.88%)/PVP and ZnPc(5.88%)-FA/PVP solution with a dose of 50  $\mu$ g. Near-IR fluorescence images were obtained at 0, 1, 2, 3, 4, 6, 8 and 24 h after injection. For histological examination, tumors from the treated group and control groups were fixed in 4% formalin and conducted with paraffin embedded sections for H&E staining. The slices were examined by a digital microscope (Olympus).

**Sample Characterization:** The solid UV-vis absorption spectra were collected in the range 200–900 nm on a Shimadzu U-3000 spectrophotometer, with a slit width of 1.0 nm. The fluorescence spectra were performed on a RF-5301PC fluorospectrophotometer with the excitation wavelength of 675 nm. The fluorescence emission spectra range in 680–750 nm, and the width of both the excitation and emission slit is 3 nm. The morphology of the samples was investigated by the Philips Tecnai 20 Transmission electron microscopy (TEM) with the accelerating voltage 200 kV. The particle size distribution was determined using a Malvern Mastersizer 2000 laser particle size analyzer. Fluorescence images of these samples were obtained using an Olympus 1X71 fluorescence microscope with 400 folds enlargement. Near-IR fluorescence images were obtained using an IVIS Lumina fluorescence imaging system (Cy5.5 channel,  $\lambda_{\text{ex}}=615\text{--}665$  nm,  $\lambda_{\text{em}}=695\text{--}770$  nm).

**Figure S1.** UV-vis absorption spectra of ZnPc loaded on different polymers (ZnPc concentration: 10  $\mu\text{g/mL}$ ; loading amount: 5.88%).

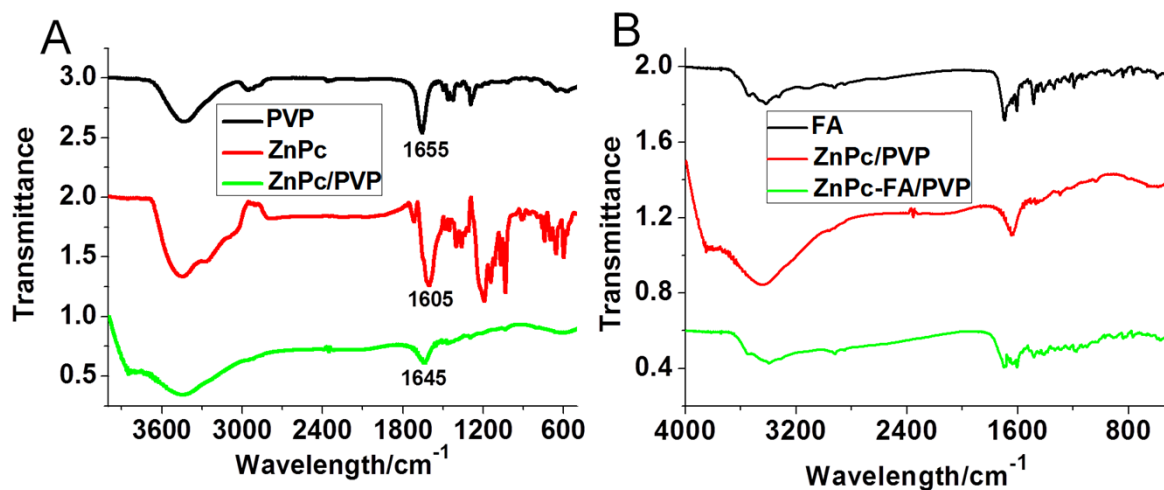

**Figure S2.** (A) FT-IR spectra of PVP, ZnPc and ZnPc/PVP; (B) FT-IR spectra of FA, ZnPc/PVP and ZnPc-FA/PVP.

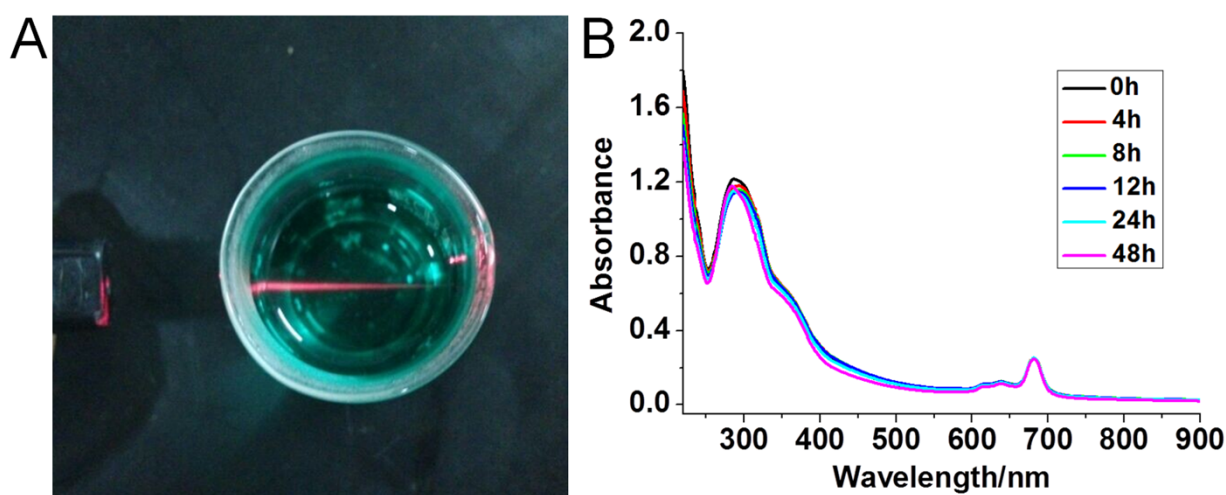

**Figure S3.** (A) The Tyndall effect of ZnPc(5.88%)-FA/PVP, indicating the formation of colloid. (B) UV-vis absorption spectra of ZnPc(5.88%)-FA/PVP colloidal solution in the dialysis test for 48 h (molecular weight cut off 3500).



In order to verify the formation of ZnPc-FA/PVP colloidal system and its stability, the purified ZnPc-FA/PVP micelle solution was loaded into a dialysis bag (molecular weight cut off 3500) and dialyzed against pure water. UV-vis spectroscopy was used to monitor the micelle solution. No obvious change in the absorption band of folic acid (289 nm) and ZnPc (682 nm) is observed during the 48 h dialysis test (Figure S3), indicating both folic acid and ZnPc are encapsulated in PVP micelle stably.

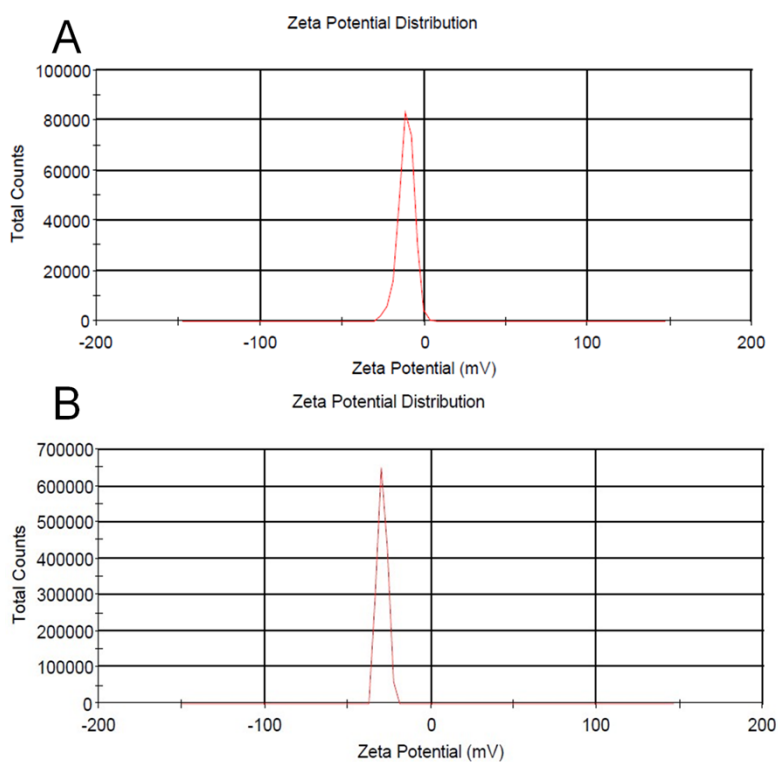

**Figure S4.** The Zeta potential for the samples of ZnPc(5.88%)/PVP (A) and ZnPc(5.88%)-FA/PVP (B).

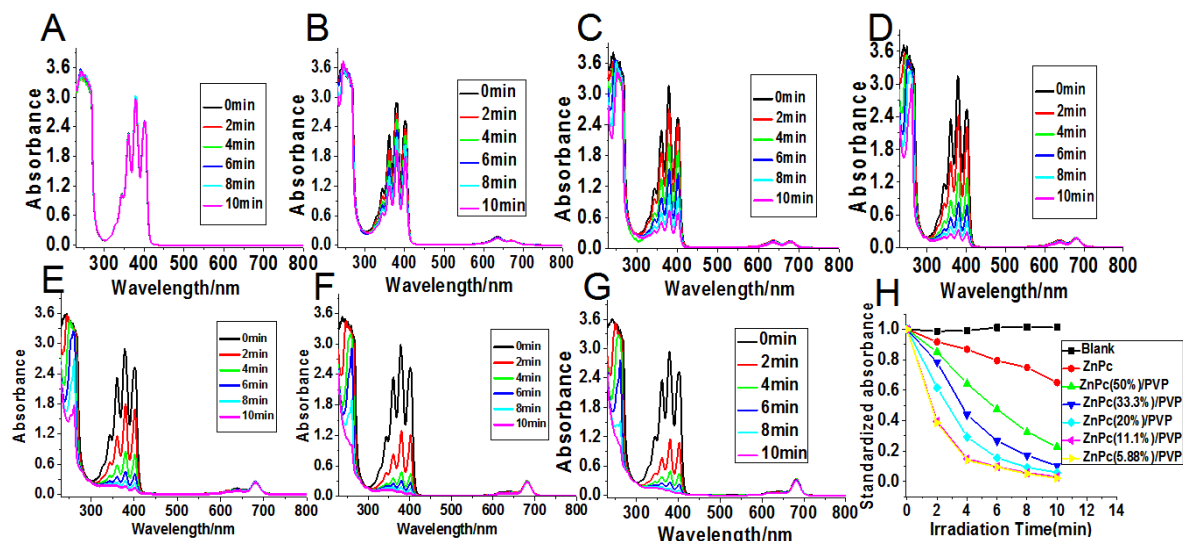

**Figure S5.** Decay curves of ADPA absorbance in the presence of (A) blank, (B) ZnPc, (C) ZnPc(50%)/LDH, (D) ZnPc(33.3%)/LDH, (E) ZnPc(20%)/LDH, (F) ZnPc(11.1%)/LDH, (G) ZnPc(11.1%)/LDH and (H) the normalized decay curves for ADPA absorbance at 378 nm in the presence of pristine ZnPc, ZnPc(x%)/PVP and blank measurement as a function of irradiation time (650 nm).

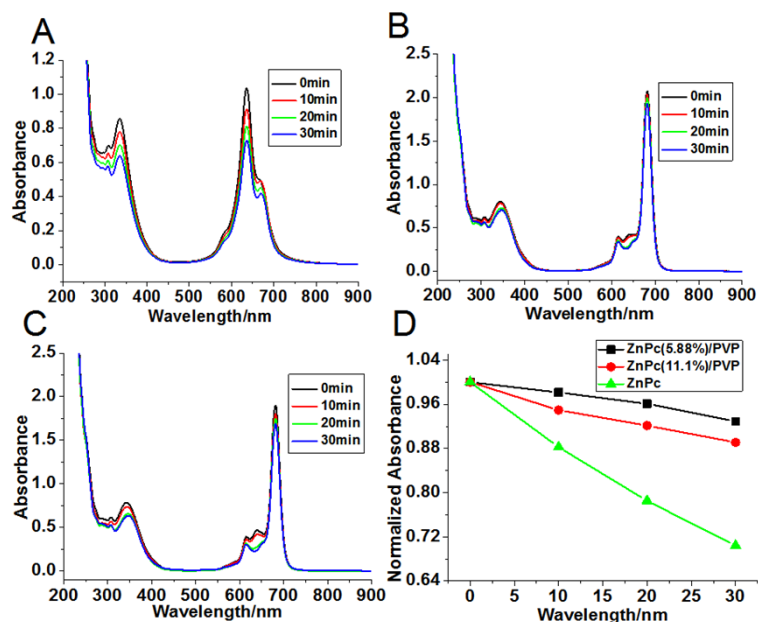

**Figure S6.** UV-vis absorption spectra of (A) ZnPc, (B) ZnPc(5.88%)/PVP, (C) ZnPc(11.1%)/PVP. (D) The normalized decay curves as a function of irradiation time (650 nm).

**Figure S7.** The fluorescence intensity of HepG2 cells after incubation in 10  $\mu\text{g/mL}$  of ZnPc(5.88%)-FA/PVP with various FA concentrations for 24 h.

**Figure S8.** The PDT performance of ZnPc( $x\%$ )-FA/PVP with various ZnPc concentrations.

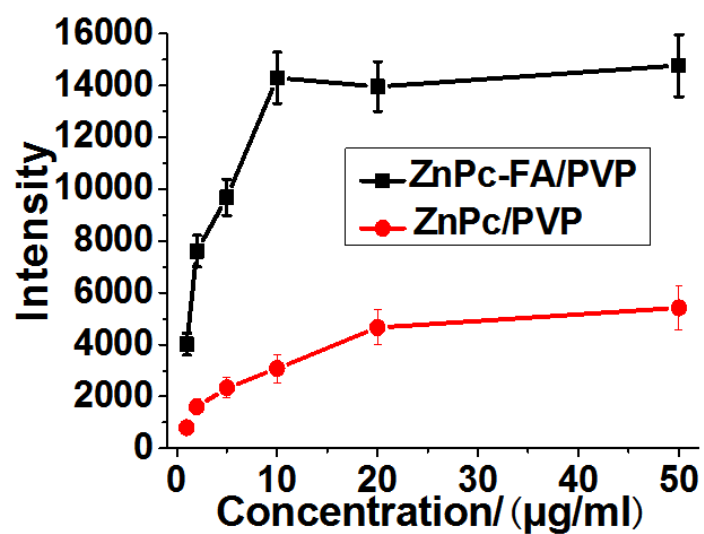

**Figure S9.** The fluorescence intensity of cell lysate samples from HepG2 cells incubated with various concentrations of ZnPc(5.88%)-FA/PVP and ZnPc(5.88%)/PVP.

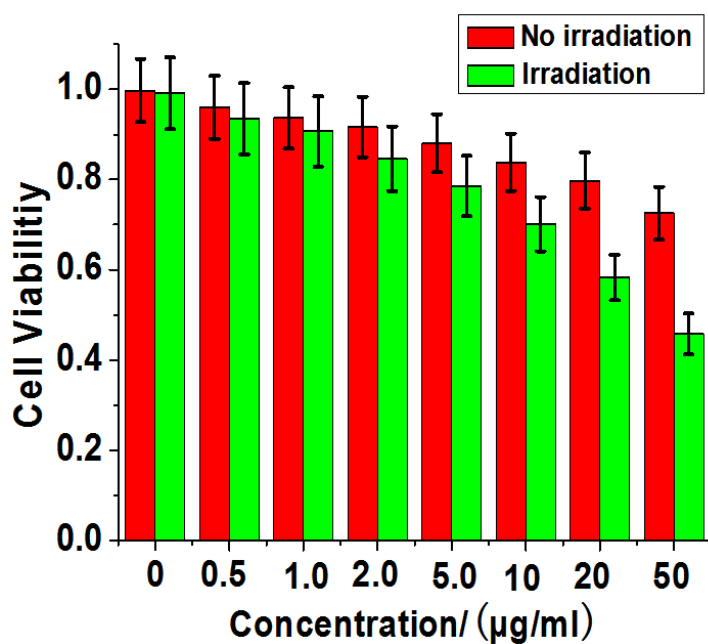

**Figure S10.** The PDT performance of ZnPc with various concentrations.

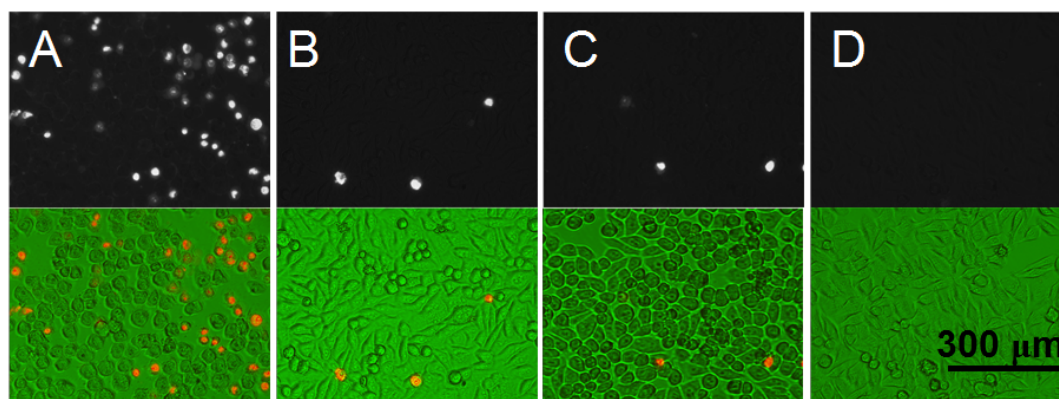

**Figure S11.** Fluorescence microscopy and merged images of HepG2 cells treated with various photosensitizers without irradiation (10  $\mu\text{g}/\text{mL}$ , 24 h incubation) (A) ZnPc, (B) ZnPc(5.88%)-FA/PVP, (C) ZnPc(5.88%)/PVP, (D) blank.

#### References:

- 1 M. Zheng, C. Yue, Y. Ma, P. Gong, P. Zhao, C. Zheng, Z. Sheng, P. Zhang, Z. Wang and L. Cai, *ACS Nano*, 2013, **7**, 2056.
- 2 G. Obaid, I. Chambrier, M. J. Cook and D. A. Russell, *Angew. Chem. Int. Ed.*, 2012, **51**, 6158.
- 3 M. Mitsunaga, M. Ogawa, N. Kosaka, L. T. Rosenblum, P. L. Choyke and H. Kobayashi, *Nat. Med.*, 2011, **17**, 1685.
